# Supplementary material
Source: PubMed Central journal article supplement (PMC8023691)
Supplement: mmc1.pdf [file mmc1.pdf]

# THE LANCET

## Rheumatology

### Supplementary appendix

This appendix formed part of the original submission. We post it as supplied by the authors.

Supplement to: Hsu TY-T, D'Silva K M, Patel N J, et al. Title. *Lancet Rheumatol* 2021; published online April 6. [https://doi.org/10.1016/S2665-9913\(21\)00106-5](https://doi.org/10.1016/S2665-9913(21)00106-5).

## **Incident systemic rheumatic disease following COVID-19**

Tiffany Y.-T. Hsu, MD<sup>1,2</sup>, Kristin M. D'Silva, MD<sup>2,3</sup>, Naomi J. Patel, MD<sup>2,3</sup>, Xiaoqing Fu, MS<sup>3</sup>, Zachary S. Wallace, MD<sup>2,3\*</sup>, Jeffrey A. Sparks, MD<sup>1,2\*</sup>

\*Co-senior authors

<sup>1</sup>Department of Medicine, Division of Rheumatology, Inflammation, and Immunity, Boston, MA, USA

<sup>2</sup>Department of Medicine, Harvard Medical School, Boston, MA, USA

<sup>3</sup>Department of Medicine, Division of Rheumatology, Allergy and Immunology, Rheumatology Unit, Massachusetts General Hospital, Boston, MA, USA

### **Supplemental material**

**Supplemental Table 1.** Rheumatic disease terms used to screen for patients with systemic rheumatic disease and their associated ICD-9 and ICD-10 codes.

**Supplemental Table 2.** Demographics of cases and comparators at time of PCR testing (index date).

**Supplemental Figure 1.** Flow diagram illustrating identification of cases of incident systemic rheumatic disease after positive or negative PCR testing for SARS-CoV-2.

**Supplemental Table 3.** Incident rheumatic diseases in patients with PCR-confirmed COVID-19.

**Supplemental Table 4.** Incident rheumatic diseases in comparators with negative PCR testing for SARS-CoV-2.

**Supplemental Table 1.** Rheumatic disease terms used to screen for patients with systemic rheumatic disease and their associated ICD-9 and ICD-10 codes.

| <b>Category</b>                    | <b>Rheumatic Disease (ICD-9 and ICD-10 codes)</b>                                                                                                                                                                                                                                                                                                                                                                                                                                                                                                                                          |
|------------------------------------|--------------------------------------------------------------------------------------------------------------------------------------------------------------------------------------------------------------------------------------------------------------------------------------------------------------------------------------------------------------------------------------------------------------------------------------------------------------------------------------------------------------------------------------------------------------------------------------------|
| Inflammatory arthritis             | <ul style="list-style-type: none"> <li>● Rheumatoid arthritis (M05%, M06%, 714%)</li> <li>● Inflammatory arthritis or inflammatory polyarthropathy (M06.4, 714.89, 714.9)</li> <li>● Juvenile idiopathic arthritis (M08.20, 714.3)</li> <li>● Psoriatic arthritis or arthropathic psoriasis (L40.50, 696.0)</li> <li>● Ankylosing spondylitis (M45.9, 720.0)</li> </ul>                                                                                                                                                                                                                    |
| Vasculitis                         | <ul style="list-style-type: none"> <li>● ANCA-associated vasculitis: granulomatosis with polyangiitis, eosinophilic granulomatosis with polyangiitis, microscopic polyangiitis (M31.3, M31.7, M30.0, 446.0, 446.4, 446.7, 447.6)</li> <li>● Kawasaki disease (M30.3, 446.1)</li> <li>● Takayasu arteritis (M31.4, 446.7)</li> <li>● Polyarteritis nodosa (M30.0, 446.0)</li> <li>● Giant cell arteritis/polymyalgia rheumatica (M31.6, 446.5, M35.3, 725%)</li> <li>● Behçet disease (M35.2, 136.1)</li> <li>● Unspecified arteritis (I77.6, 447.6)</li> </ul>                             |
| Other Systemic Autoimmune Diseases | <ul style="list-style-type: none"> <li>● Systemic lupus erythematosus (M32%, 710.0)</li> <li>● Sjögren syndrome (M35.0, 710.2)</li> <li>● Idiopathic inflammatory myositis: dermatomyositis, polymyositis, statin-associated autoimmune myositis, unspecified myositis (G72.49, G72.41, M33, 710.3, 710.4)</li> <li>● Systemic sclerosis (M34.0, M34.1, M34.8%, M34.9, 710.1)</li> <li>● Mixed connective tissue disease (M35.1, 710.9)</li> <li>● Antiphospholipid syndrome (D68.61, 239.81)</li> <li>● Sarcoidosis (D86.0, D86.9, 135%)</li> <li>● IgG4-related disease (M35)</li> </ul> |

ICD = international classification of disease 9th or 10th revision codes

**Supplemental Table 2.** Demographics of cases and comparators at time of PCR testing (index date). Comparators were matched to cases by age (+/- 5 years) and sex.

|                                           | <b>PCR+ cases<br/>(n=15,284)</b> | <b>PCR- comparators<br/>(n=15,284)</b> |
|-------------------------------------------|----------------------------------|----------------------------------------|
| Female sex, n (%)                         | 8244 (54)                        | 8244 (54)                              |
| Mean age, years (SD)                      | 47 (20)                          | 46 (20)                                |
| Median age, years [IQR]                   | 46 [31, 61]                      | 45 [30, 60]                            |
| Categorical age by decade of years, n (%) |                                  |                                        |
| <20                                       | 804 (5)                          | 804 (5)                                |
| 20 to <30                                 | 2527 (17)                        | 2527 (17)                              |
| 30 to <40                                 | 2704 (18)                        | 2704 (18)                              |
| 40 to <50                                 | 2502 (16)                        | 2502 (16)                              |
| 50 to <60                                 | 2624 (17)                        | 2624 (17)                              |
| 60 to <70                                 | 1893 (12)                        | 1893 (12)                              |
| 70 to <80                                 | 1120 (7)                         | 1120 (7)                               |
| 80+                                       | 1110 (7)                         | 1110 (7)                               |

**Supplemental Figure 1.** Flow diagram illustrating identification of cases of incident systemic rheumatic disease after positive or negative PCR testing for SARS-CoV-2.

Incident rheumatic disease after PCR+ for SARS-CoV-2

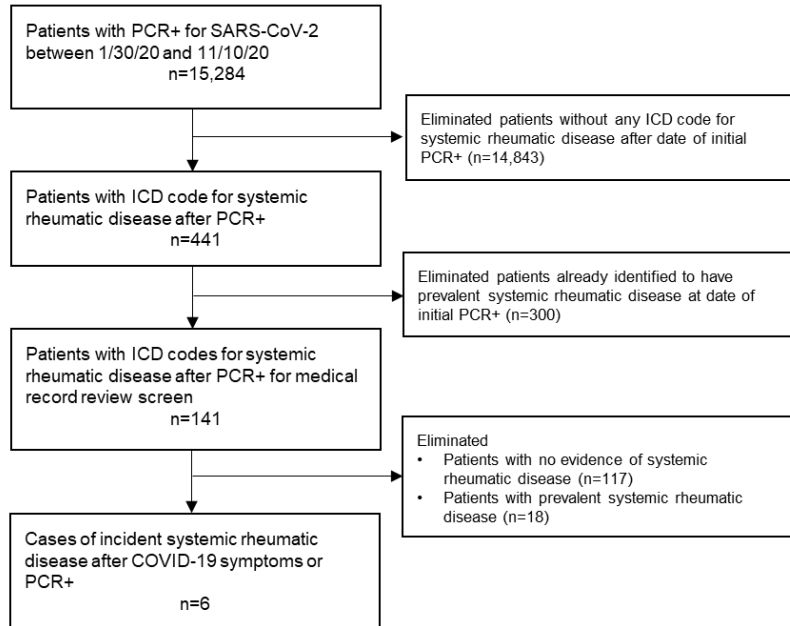

Incident rheumatic disease after PCR- for SARS-CoV-2

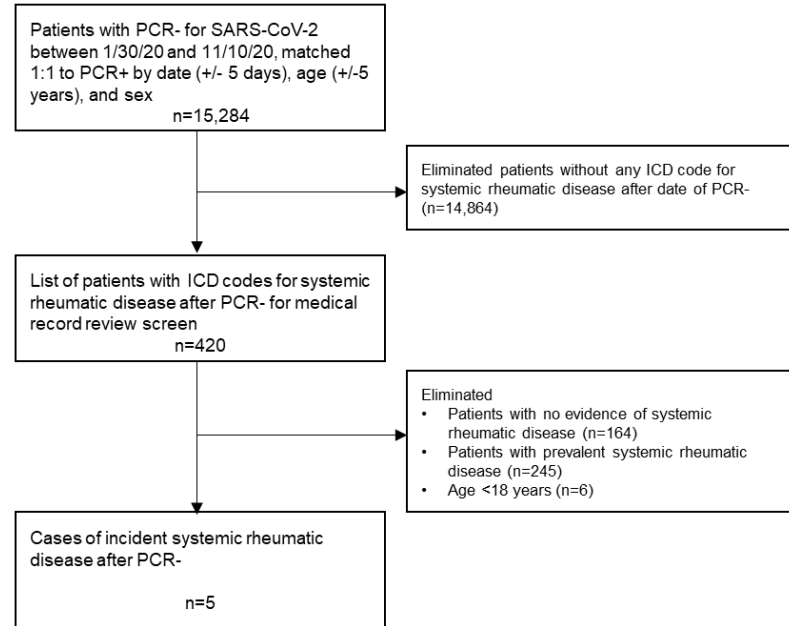

**Supplemental Table 3.** Incident rheumatic diseases in patients with PCR-confirmed COVID-19.

| Age, years | Sex    | Clinical or autoimmune features before COVID-19 | COVID-19 complications                       | COVID-19 pharmacologic treatment                                      | Lingering COVID-19 symptoms | Days from positive SARS-CoV-2 PCR test to rheumatic disease diagnosis | Rheumatic diagnosis                                                  | Meets classification criteria? | Rheumatic disease treatment                                             |
|------------|--------|-------------------------------------------------|----------------------------------------------|-----------------------------------------------------------------------|-----------------------------|-----------------------------------------------------------------------|----------------------------------------------------------------------|--------------------------------|-------------------------------------------------------------------------|
| 37         | Female | None                                            | Hospitalization                              | None                                                                  | None                        | 3                                                                     | Seronegative inflammatory arthritis                                  | No*                            | None                                                                    |
| 70         | Male   | None                                            | Hospitalization, death due to cardiac arrest | None                                                                  | None                        | 4                                                                     | Giant cell arteritis                                                 | Yes†                           | Methylprednisolone pulse, then high-dose prednisone                     |
| 38         | Male   | None                                            | Hospitalization                              | Remdesivir x 5 days (200 mg IV on day 1, 100 mg IV daily on days 2-5) | Proximal muscle weakness    | 7                                                                     | Dermatomyositis (myopathy from type I interferonopathy) <sup>5</sup> | Yes‡                           | Methylprednisolone pulse, then high-dose prednisone, IVIG               |
| 67         | Female | DVT/PE                                          | None                                         | None                                                                  | None                        | 74                                                                    | Antiphospholipid syndrome                                            | Yes§                           | Warfarin                                                                |
| 47         | Female | Arthralgias without synovitis                   | None                                         | None                                                                  | None                        | 89                                                                    | Seronegative rheumatoid arthritis                                    | Yes                            | Low-dose prednisone taper, hydroxychloroquine, methotrexate, infliximab |
| 35         | Female | Arthralgias without synovitis, positive ANA     | None                                         | None                                                                  | Cough                       | 104                                                                   | Primary Sjögren's syndrome                                           | Yes¶                           | Hydroxychloroquine                                                      |

ANA, antinuclear antibody; COVID-19, Coronavirus Disease 2019; DVT, deep vein thrombosis; IVIG, intravenous immunoglobulin; N/A, not applicable; PE, pulmonary embolism; PCR, polymerase chain reaction; SARS-CoV-2, Severe Acute Respiratory Syndrome Coronavirus 2.

\*Per 2010 ACR/EULAR classification criteria for rheumatoid arthritis

†Per 1990 American College of Rheumatology classification criteria for giant cell arteritis

‡Per 2017 ACR/EULAR classification criteria for idiopathic inflammatory myopathies

§Per revised Sapporo classification criteria for antiphospholipid syndrome

||Per 1987 ACR classification criteria for rheumatoid arthritis

¶Per 2016 ACR/EULAR classification criteria for primary Sjögren's syndrome

**Supplemental Table 4.** Incident rheumatic diseases in comparators with negative PCR testing for SARS-CoV-2.

| Age, years | Sex    | Clinical or autoimmune features before COVID-19 | Days from negative SARS-CoV-2 PCR test to rheumatic disease diagnosis | Rheumatic diagnosis               | Meets classification criteria? | Rheumatic disease treatment             |
|------------|--------|-------------------------------------------------|-----------------------------------------------------------------------|-----------------------------------|--------------------------------|-----------------------------------------|
| 76         | Female | None                                            | 45                                                                    | Polymyalgia rheumatica            | Yes*                           | Prednisone                              |
| 83         | Male   | None                                            | 129                                                                   | Polymyalgia rheumatica            | Yes*                           | Prednisone                              |
| 85         | Female | None                                            | 30                                                                    | Polymyalgia rheumatica            | Yes*                           | Prednisone                              |
| 51         | Female | None                                            | 100                                                                   | Seronegative rheumatoid arthritis | Yes†                           | Prednisone, sulfasalazine, methotrexate |
| 66         | Female | None                                            | 102                                                                   | Polymyalgia rheumatica            | Yes*                           | Prednisone, methotrexate                |

PCR, polymerase chain reaction; SARS-CoV-2, Severe Acute Respiratory Syndrome Coronavirus 2.

\*Per 2012 EULAR/ACR provisional classification criteria for polymyalgia rheumatica

†Per 2010 ACR/EULAR classification criteria for rheumatoid arthritis
